# Supplementary material for: Real-time algorithm for Poissonian noise reduction in low-dose fluoroscopy: performance evaluation
Source: Biomed Eng Online. 2019 Sep 11;18:94. doi: 10.1186/s12938-019-0713-7 (PMC6737613; doi:10.1186/s12938-019-0713-7)
Supplement: Supplementary file 3 — Additional file 3. The NVCA Matlab routine function. It produces the NVCA-filtered sequence, requiring as inputs the raw fluoroscopy sequence, the spatial (N) and temporal (K) filter dimensions, the noise coefficients (A and B) and the F value. [file 12938_2019_713_MOESM3_ESM.m]

%{Legal Notice


This Matlab Routine was developed by autors of the paper "Sarno et al, Real-time algorithm for poissonian noise reduction in low-dose fluoroscopy: performance evaluation, Biomedical %Engineering Online, (2019) under review�.

By downloading and/or using any of these files you agree to the following terms. 
If you do not agree to the following terms, please notice that you are not allowed to use the files. 

Using terms:
(i) reproduction, use, and modification are for informational and non-commercial or personal use only and will not be copied or posted on any network computer or broadcast in any media;
(ii) any reproduction or modification retains all original notices including proprietary or copyright notices; 
(iii) reference to the original authors is given whenever results, which arise from the use of the provided material or any modification of it, are made public.

No other use is hereby authorized.

%}


function [FILT_SEQ, Thres] = NVCA(SEQ,DIM_S,DIM_T,a,b,N_SIGMA)
%NVCA Summary of this function goes here
%   SEQ is the video sequence
%   DIM_S is the spatial dimension of filter mask
%   DIM_T is the temporal dimension of filter mask
%   a is the slope of the variance-expected value curve
%   b is the intercept of the variance-expected value curve
%   N_SIGMA is the proportional coefficient between the threshold TH and
%   the noise standard deviation. TH = N_SIGMA * SIGMA_noise

[n_rows,n_coloumn,n_frames]=size(SEQ);

% FINAL SEQUENCE MATRIX
% Dimensions
rows_f = n_rows+2*floor(DIM_S/2);
cols_f = n_coloumn+2*floor(DIM_S/2);
frames_f = n_frames+2*floor(DIM_T/2);

% Matrix
seq_f = zeros(rows_f, cols_f, frames_f);

% HOLDING MATRIX
hold_mat = seq_f;
% Raw sequence must be placed at the following rows/cols/frames ranges
rows_h = floor(DIM_S/2)+1:n_rows+floor(DIM_S/2);
cols_h = floor(DIM_S/2)+1:n_coloumn+floor(DIM_S/2);
frames_h = DIM_T:n_frames+DIM_T-1;
hold_mat(rows_h, cols_h, frames_h) = SEQ;


%% FILTERING

for i = DIM_T :(n_frames + DIM_T - 1)
    
    % Percentage of completion 
    filtered_frames_perc = round(100*(i-DIM_T+1)/n_frames);
    disp(['Perc done: ', num2str(filtered_frames_perc), '%']);
    
    
    for j = (floor(DIM_S/2) + 1) : (n_rows + floor(DIM_S/2))

       for k = (floor(DIM_S/2) + 1) : (n_coloumn + floor(DIM_S/2))
            
            % DIM_S x DIM_S x DIM_T neighborhood of the current pixel
            curr_pixel_mask = hold_mat(j-floor(DIM_S/2):j+floor(DIM_S/2),k-floor(DIM_S/2):k+floor(DIM_S/2),i-DIM_T+1:i);
            
            % Current pixel
            curr_pixel = curr_pixel_mask(ceil(DIM_S/2),ceil(DIM_S/2),DIM_T);
            
            % Standard deviation of noise
            Sigma_noise = sqrt(b+a*curr_pixel);
            
            % Threshold
            Thres(i,j,k) = N_SIGMA*Sigma_noise;
                        
            % Binary mask of pixels out of the [-Thres; Thres] range
            M = abs(curr_pixel_mask-curr_pixel) > N_SIGMA*Sigma_noise;
            
            % Pixels out of the [-Thres; Thres] range are set to 0 in order
            % to exclude them from average computation
            curr_pixel_mask(M) = 0;

            % Updates the current pixel value with the result of the conditioned average
            seq_f(j,k,i) = sum( curr_pixel_mask(:) ) / ( (DIM_S*DIM_S*DIM_T) - sum(M(:)) );        
       end
    end
end

FILT_SEQ = seq_f(floor(DIM_S/2)+1:n_rows+floor(DIM_S/2),floor(DIM_S/2)+1:n_coloumn+floor(DIM_S/2),DIM_T:n_frames+DIM_T-1);

end
